# Supplementary material for: Signatures of Plexcitonic States in Molecular Electroluminescence
Source: PubMed Central journal article supplement (PMC5797164; doi:10.1038/s41598-018-19382-2), 2018-02-02
Supplement: 41598_2018_19382_MOESM1_ESM.pdf [file 41598_2018_19382_MOESM1_ESM.pdf]

# Supporting Information: Signatures of Plexcitonic States in Molecular Electroluminescence

Justin P. Bergfield<sup>\*,†</sup> and Joshua R. Hendrickson<sup>¶</sup>

<sup>†</sup>*Department of Physics, Illinois State University, Normal, IL*

<sup>‡</sup>*Department of Chemistry, Illinois State University, Normal, IL*

<sup>¶</sup>*Air Force Research Laboratory, Sensors Directorate, Wright-Patterson Air Force Base,  
Ohio 45433, USA*

E-mail: jpbergf@ilstu.edu

## Plexitonic Coupling Values

The Rabi splitting of the plexcitonic states is given by  $g_{ij} = F_{ij}g_0$ ,

$$\hbar g_0 = E_{\text{vac}}\mu_e u_j(x_0), \quad (1)$$

where the vacuum field is given by

$$E_{\text{vac}} = \left( \frac{\hbar\omega}{2\varepsilon_0 V} \right)^{1/2}. \quad (2)$$

Density functional calculations using the B3LYP functional predict the dipole moment of the  $Q(0,0)$  transition of TPP to be  $\mu_e = 0.44\text{e}\text{\AA}$ .<sup>1</sup> Realistic values for  $V_0$  vary significantly; for instance, a planar cavity with  $\sim 1\mu\text{m}$  spacing gives  $V_0 \sim 10^{-15}\text{m}^3$ , while microstructures have demonstrated  $V_0 \propto (\lambda/n)^3$ . If we use  $\lambda=656\text{nm}$  (1.89eV) then  $V_0 \sim 10^{-19}\text{m}^3$  for  $n = 1.0$ . With the vacuum field only (i.e.  $E_{\text{vac}}=4.13\times 10^6$  V/m and  $u_j(x_0) = 1$ ), this gives  $\hbar g_0 \sim 183\mu\text{eV}$  and using the Franck-Condon approximation discussed in the text  $\hbar g_{11} = 0.54g_0 = 99\mu\text{eV}$ . This gives a vacuum Rabi splitting of  $\sim 197\mu\text{eV}$ .

Using the experimental linewidths as a rough estimate, we find  $\hbar\kappa \sim 50\text{meV}$ . The strong coupling regime can be identified from the EL when  $|g|/\kappa > 0.25$ . In terms of the plexcitonic coupling, this requirement for the TPP junction equates to  $\hbar g_{11} > 23\text{meV}$ . Therefore, the strong coupling regime can be observed with our assumed parameters when the plasmon field strength exceeds the vacuum field by  $\sim 232$  times or  $|E_{\text{plas}}| > \sim 9.6 \times 10^8 \text{ V/m}$ .

## STML from TPP at $T=300\text{K}$

Temperature plays a significant role in the EL of the TPP junction. The simulated STML for a TPP junction operating at room temperature are shown in Fig. 1.

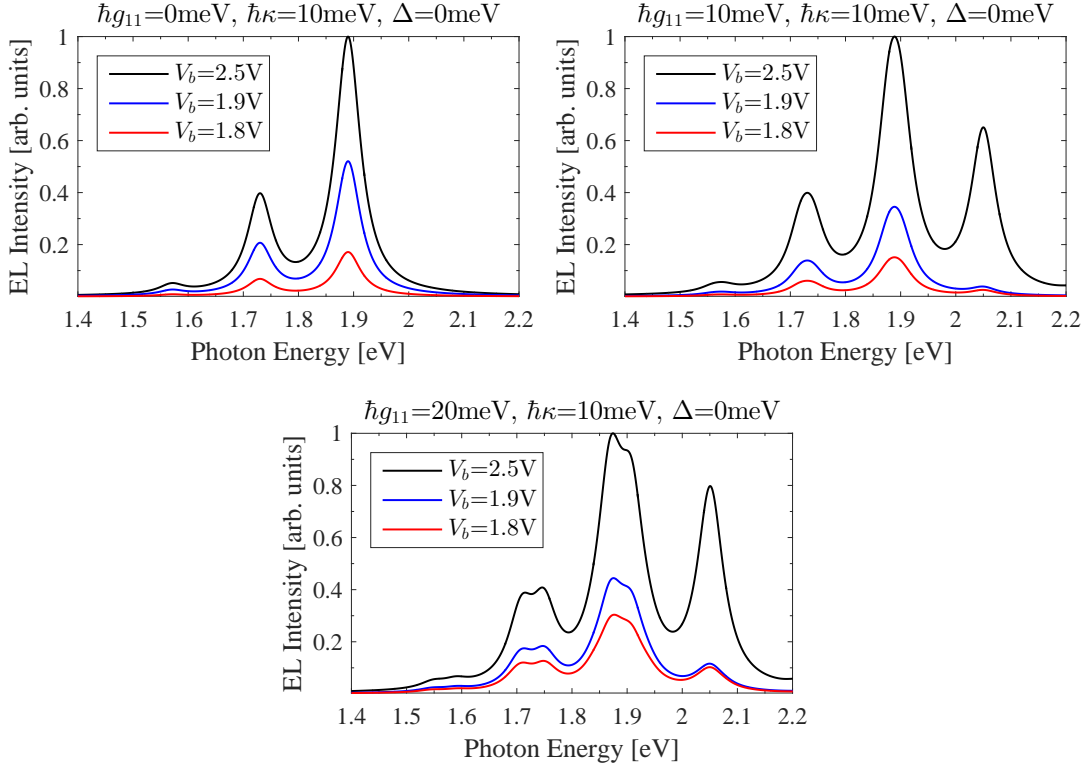

Figure 1: The calculated STML of a TPP molecule coupled to a single plasmon mode, shown as a function of photon energy for three plexcitonic coupling strengths  $\hbar g_{11} = 0\text{meV}$ ,  $20\text{meV}$ , and  $30\text{meV}$  at three bias voltages  $V_b = 1.8\text{V}$ ,  $1.9\text{V}$ ,  $2.5\text{V}$ . All results are for junctions operating at  $T = 300\text{K}$ . In the decoupled cavity limit ( $\hbar g_{11} = 0$ ), the molecular vibrational spectrum is recovered. The  $1.8\text{V}$  EL is significantly enhanced as compared with the  $T = 80\text{K}$  spectra

# Franck-Condon Factors

The Franck-Condon factor is square of the overlap integral between nuclear wavefunctions,

$$F_{ij} = \langle i|j \rangle^2. \quad (3)$$

In this work we assume a harmonic potential landscape such that the overlap integral may be written as<sup>2</sup>

$$\langle i|j \rangle = \sqrt{\frac{i!}{j!}} (-S)^{\frac{(j-i)}{2}} \exp\left(-\frac{S}{2}\right) L_i^{j-i}(S) \quad (4)$$

where  $L_m^n(x)$  are the associated Laguerre polynomials,

$$L_m^n(x) = \sum_{k=0}^m \frac{(-1)^k (m+n)!}{(m-k)!(n+k)!k!} x^k, \quad (5)$$

and  $S$  is the Huang-Rhys parameter.

## References

- (1) Tian, G.; Luo, Y. Electroluminescence of molecules in a scanning tunneling microscope: role of tunneling electrons and surface plasmons. *Phys. Rev. B* **2011**, *84*, 205419.
- (2) Keil, T. H. Shapes of impurity absorption bands in solids. *Physical Review* **1965**, *140*, A601.
